# Supplementary material
Source: publisher figshare collection journal article supplement (https://acs.figshare.com/ndownloader/files/3939625)
Supplement: Supplementary file 1 [file 3939625]

Superhydrophobic Cu mesh combined with a superoleophilic polyurethane  
sponge for oil spill adsorption and collection

Fajun Wang\*, Sheng Lei, Changquan Li, Junfei Ou, Mingshan Xue, Wen Li

School of Materials Science and Engineering, Nanchang Hangkong University, Nanchang 330063,

P. R. China

\*To whom correspondence should be addressed.

Tel.: +86-791-6453210; fax: +86-791-6453210

E-mail: jjbxsjz@foxmail.com (Fajun Wang) and wantforjune@163.com (Changquan Li)

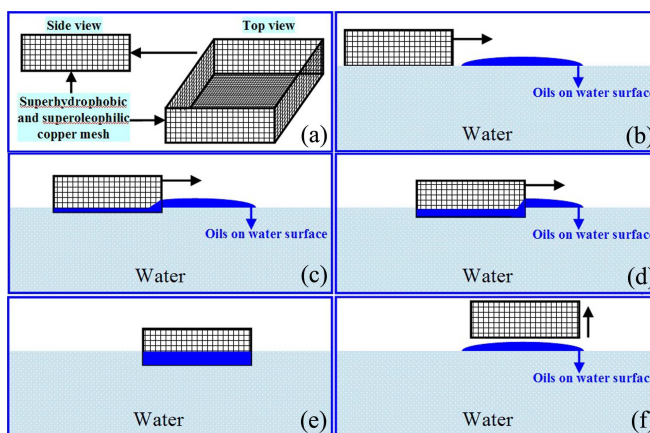

Figure S1. (a)-(f) A schematic illustration of an attempt for the separating of oil from water surface by using the superhydrophobic copper mesh box.

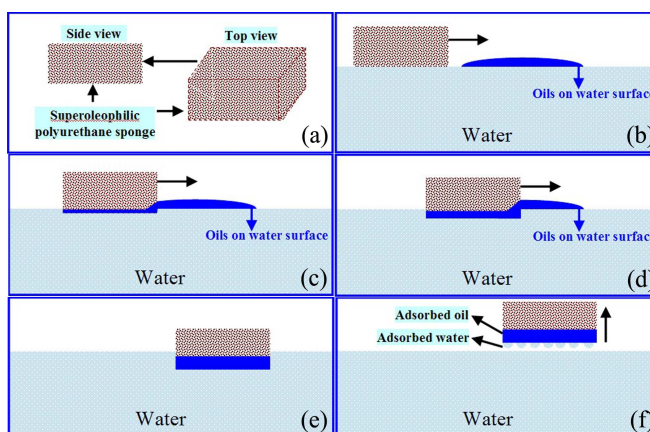

Figure S2. (a)-(f) A schematic illustration of the oil-water separation process from the water surface by using the as-received PU sponge.

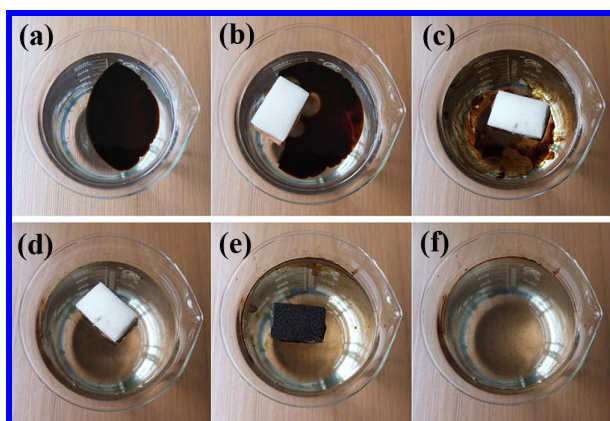

Figure S3. (a)-(f) Process of the separating crude oil from water surface by using the miniature device. (a) Crude oil floated on water surface; (b) the miniature device approached to the crude oil; (c) crude oil was adsorbed by the miniature device gradually; (d) most of the crude oil was adsorbed by the miniature device; (e) after repeating the miniature device gradually; (f) most of the crude oil was adsorbed by the miniature device; (e) after repeating

the adsorption process, the miniature approaches its maximum loading capacity 21 times weight of the blank PU sponge); (f) after removed the miniature device, only a small amount of crude oil remained in water surface.
